# Supplementary material for: Optimization of Multiple W1/O/W2 Emulsions Processing for Suitable Stability and Encapsulation Efficiency
Source: MDPI journal article supplement (doi:10.3390/foods11091367), 2022-05-09
Supplement: s1 [file s1]

## Supplementary Material

**Table S1.** Correlation of systems analysed in this research, evaluating two parameters: the concentration of the oil phase ratio in the secondary emulsion as well as the effect of the thickening agent.

| Passes                                   | Evaluation of Oil Phase | Evaluation of Thickening Agent |
|------------------------------------------|-------------------------|--------------------------------|
| (W <sub>1</sub> /O)/W <sub>2</sub> ratio | 10/90                   | 0                              |
|                                          | 25/75                   | 0                              |
|                                          | 60/40                   | 0                              |
|                                          | 25/75                   | 0                              |
| XG concentration (wt.%)                  | 25/75                   | 1.25                           |
|                                          | 25/75                   | 0.25                           |

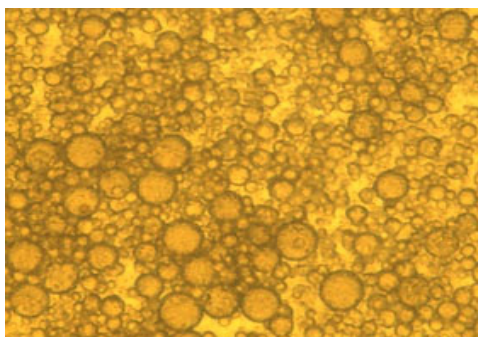

**Figure S1.** Images of double emulsion droplets (emulsion containing 25/75 of (W<sub>1</sub>/O)/W<sub>2</sub>) obtained from an optical microscopy.
